# Supplementary material
Source: PubMed Central journal article supplement (PMC4367237)
Supplement: Supp_Fig1.pdf [file Supp_Fig1.pdf]

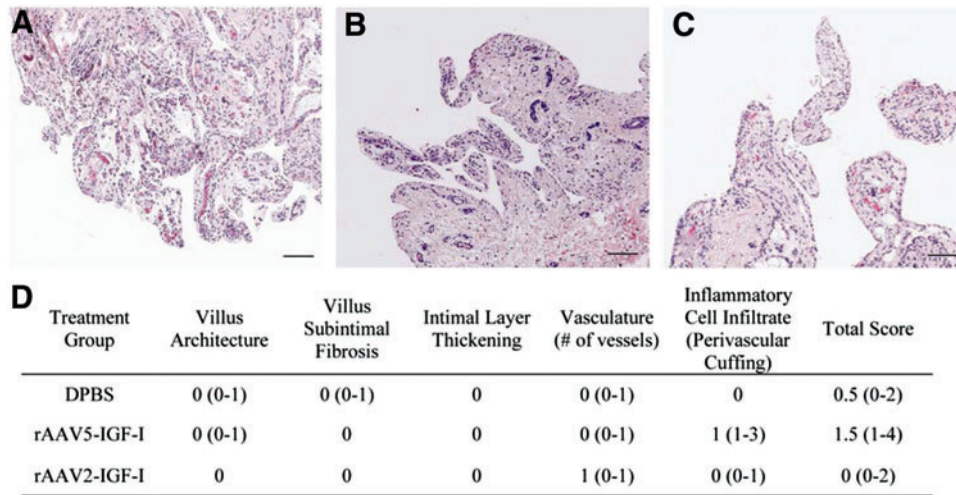

**SUPPLEMENTARY FIG. S1.** Photomicrographs of synovial membrane harvested from middle carpal joints 56 days after injection of (A) DPBS, (B) rAAV5-IGF-I, or (C) rAAV2-IGF-I. There were no significant differences in histological scores of synovial membrane biopsies obtained from the three treatment groups (D). Scale bar, 100  $\mu$ m.
