# Supplementary material
Source: PubMed Central journal article supplement (PMC4367237)
Supplement: Supp_Table1.pdf [file Supp_Table1.pdf]

## Supplementary Data

SUPPLEMENTARY TABLE S1. SCORING SYSTEM  
FOR SYNOVIAL MEMBRANE BIOPSIES COLLECTED  
56 DAYS POSTINJECTION

| <i>Scoring parameter</i>                            | <i>Qualifications (%)</i>            |
|-----------------------------------------------------|--------------------------------------|
| Villus architecture                                 |                                      |
| 0                                                   | Normal                               |
| 1                                                   | Slight clubbing                      |
| 2                                                   | Moderate clubbing                    |
| 3                                                   | Severe clubbing                      |
| Villus subintimal fibrosis                          |                                      |
| 0                                                   | Normal                               |
| 1                                                   | Slightly increased                   |
| 2                                                   | Moderately increased                 |
| 3                                                   | Severely increased                   |
| Intimal layer thickening                            |                                      |
| 0                                                   | Normal (1 or 2 layers)               |
| 1                                                   | Slight thickening (3 or 4 layers)    |
| 2                                                   | Moderate thickening (5 or 6 layers)  |
| 3                                                   | Severe thickening ( $\geq 7$ layers) |
| Vasculature (no. of vessels)                        |                                      |
| 0                                                   | Normal                               |
| 1                                                   | Slightly increased                   |
| 2                                                   | Moderately increased                 |
| 3                                                   | Severely increased                   |
| Inflammatory cell infiltrate (perivascular cuffing) |                                      |
| 0                                                   | Normal                               |
| 1                                                   | Slightly increased                   |
| 2                                                   | Moderately increased                 |
| 3                                                   | Severely increased                   |

Data in table are presented as median (range) from four horses per group. Results were analyzed by ANOVA. Scoring: 0, normal synovium; 15, most abnormal synovium.
